# Supplementary material for: Long-Term Impact of COVID-19 Pandemic in Sleep Quality and Lifestyle in Young Adults
Source: MDPI journal article supplement (doi:10.3390/ijerph191912333), 2022-09-28
Supplement: s1 [file s1]

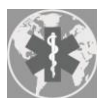

**Table S1.** Questionnaire of the study.

| Demographics                                                                                                                                                                                                                                                                                                                                                                                                                                                                                                                                                                                                                                                                                                                                                                                                                                                                                                                                                          |         |                          |                                                                                                                                                                                                                                                                                         |
|-----------------------------------------------------------------------------------------------------------------------------------------------------------------------------------------------------------------------------------------------------------------------------------------------------------------------------------------------------------------------------------------------------------------------------------------------------------------------------------------------------------------------------------------------------------------------------------------------------------------------------------------------------------------------------------------------------------------------------------------------------------------------------------------------------------------------------------------------------------------------------------------------------------------------------------------------------------------------|---------|--------------------------|-----------------------------------------------------------------------------------------------------------------------------------------------------------------------------------------------------------------------------------------------------------------------------------------|
| Age<br>(years): .....                                                                                                                                                                                                                                                                                                                                                                                                                                                                                                                                                                                                                                                                                                                                                                                                                                                                                                                                                 | Gender: |                          | <b>Weight in Kilograms:.....</b><br><b>Height in cm: .....</b>                                                                                                                                                                                                                          |
|                                                                                                                                                                                                                                                                                                                                                                                                                                                                                                                                                                                                                                                                                                                                                                                                                                                                                                                                                                       | Male    | <input type="checkbox"/> |                                                                                                                                                                                                                                                                                         |
|                                                                                                                                                                                                                                                                                                                                                                                                                                                                                                                                                                                                                                                                                                                                                                                                                                                                                                                                                                       | Female  | <input type="checkbox"/> | <b>Smoking history:</b><br><b>Smoker:</b> <input type="checkbox"/><br><b>Vaper:</b> <input type="checkbox"/><br><b>Smoker and vaper:</b> <input type="checkbox"/><br><b>Ex smoker and/or vaper:</b> <input type="checkbox"/><br><b>No smoker and no vaper:</b> <input type="checkbox"/> |
| <b>If smoker or smoker and vaper:</b><br>Years of smoking: .....<br>Cigarettes per day 3 months prior to lockdown: .....<br>Cigarettes per day during lockdown: .....<br>Cigarettes per day 3 months following lockdown: .....                                                                                                                                                                                                                                                                                                                                                                                                                                                                                                                                                                                                                                                                                                                                        |         |                          |                                                                                                                                                                                                                                                                                         |
| <b>If vaper or smoker and vaper...</b><br>Years of vaping: .....<br>ml per day 3 months prior to lockdown: .....<br>ml per day during lockdown: .....<br>ml per day 3 months following lockdown: .....                                                                                                                                                                                                                                                                                                                                                                                                                                                                                                                                                                                                                                                                                                                                                                |         |                          |                                                                                                                                                                                                                                                                                         |
| <b>Sleeping habits</b><br>How many hours did you sleep per day 3 months prior to lockdown: .....<br>How many hours did you sleep per day during lockdown: .....<br>How many hours did you sleep per day 3 months following lockdown: .....<br>How many times in minutes did you need until you fell asleep at night (per day) 3 months prior to lockdown: .....<br>How many time in minutes did you need until you fell asleep at night (per day) during lockdown: .....<br>How many time in minutes did you need until you fell asleep at night (per day) 3 months following lockdown: .....<br>How many times did you wake per night day 3 months prior to lockdown: .....<br>How many times did you wake per night day during lockdown: .....<br>How many times did you wake per night day 3 months following lockdown: .....<br>Did you experience restless sleep 3 months prior to lockdown: Yes No<br>Did you experience restless sleep during lockdown: Yes No |         |                          |                                                                                                                                                                                                                                                                                         |

---

Did you experience restless sleep **3 months following lockdown**: Yes No

Did you experience difficulty in waking up **3 months prior to lockdown**: Yes No

Did you experience difficulty in waking up **during lockdown**: Yes No

Did you experience difficulty in waking up **3 months following lockdown**: Yes No

Did you experience morning headaches **3 months prior to lockdown**: Yes No

Did you experience morning headaches **during lockdown**: Yes No

Did you experience morning headaches **3 months following lockdown**: Yes No

Did you experience irritability during the morning **3 months prior to lockdown**: Yes No

Did you experience irritability during the morning **during lockdown**: Yes No

Did you experience irritability during the morning **3 months following lockdown**: Yes No

---



---

Number of daily meals **3 months prior to lockdown**: .....

Number of daily meals **during lockdown**: .....

Number of daily meals **3 months following lockdown**: .....

#### Dietary habits

How often did you consume alcohol **3 months prior to lockdown**:

Every day: ☐

3–4 times/week: ☐

1–2 times/week: ☐

Never or almost never: ☐

How often did you consume alcohol **during lockdown**:

Every day: ☐

3–4 times/week: ☐

1–2 times/week: ☐

---

---

Never or almost never: ☐

How often did you consume alcohol **3 months following lockdown:**

Every day: ☐

3–4 times/week: ☐

1–2 times/week: ☐

Never or almost never: ☐

---



---

**Type of physical activity-exercise**

Gym: ☐

Cycling: ☐

Walking: ☐

Other: ☐

No activity: ☐

---

Kind of physical activity-exercise

Free: ☐

Instructed: ☐

---

**Years of physical activity-exercise: .....**

---

**Physical activity-exercise**

How many days per week did you perform physical activity-exercise **3 months prior to lockdown:** .....

How many days per week did you perform physical activity-exercise **during lockdown:** .....

How many days per week did you perform physical activity-exercise **3 months following lockdown:** .....

---

Time in minutes of physical activity-exercise per day 3 months prior to lockdown: .....

Time in minutes of physical activity-exercise per day **during lockdown:** .....

Time in minutes of physical activity-exercise per day **3 months following lockdown:** .....

---
